# Supplementary material for: Intrinsic disorder controls two functionally distinct dimers of the master transcription factor PU.1
Source: PubMed Central journal article supplement — Sci Adv. 2020 Feb 21;6(8):eaay3178. doi: 10.1126/sciadv.aay3178 (PMC7034988; doi:10.1126/sciadv.aay3178), 2020-02-21
Supplement: aay3178_SM.pdf [file aay3178_SM.pdf]

## Supplementary Materials for

### **Intrinsic disorder controls two functionally distinct dimers of the master transcription factor PU.1**

Suela Xhani, Sangchoon Lee, Hye Mi Kim, Siming Wang, Shingo Esaki, Van L. T. Ha, Mahtab Khanezarrin, Giselle L. Fernandez, Amanda V. Albrecht, James M. Aramini, Markus W. Germann\*, Gregory M. K. Poon\*

\*Corresponding author. Email: gpoon@gsu.edu (G.M.K.P.); mwg@gsu.edu (M.W.G.)

Published 21 February 2020, *Sci. Adv.* **6**, eaay3178 (2020)  
DOI: 10.1126/sciadv.aay3178

#### **This PDF file includes:**

Table S1. DNA binding and self-association equilibrium constants of PU.1 constructs.

Table S2. Primers in RT-PCR experiments.

Fig. S1. Calibration of transgenic PU.1 dosage.

Fig. S2. Characterization of a peptide-based PU.1 inhibitor.

Fig. S3.  $^1\text{H}$ - $^{15}\text{N}$  HSQC-detected titration of  $\Delta\text{N117}$  and  $\Delta\text{N165}$  by cognate DNA.

Fig. S4. Purity of recombinant PU.1 constructs.

Fig. S5. Spectral analysis of far-UV CD of  $\Delta\text{N165}$  in 0.15 and 0.05 M NaCl.

Fig. S6. Salt-dependent line broadening of methyl protons in  $\Delta\text{N165}$ .

Fig. S7 The short C-terminal IDR is required for DNA-free PU.1 dimerization.

Fig. S8. Effect of macromolecular crowding on dimerization of  $\Delta\text{N165}$  in the unbound and DNA-bound states.

**Table S1. DNA binding and self-association equilibrium constants of PU.1 constructs.**

DNA-binding data was fitted to titration models as detailed in *Materials and Methods*. The choice of fitting with one or two dissociation constants was made based on the magnitude of anisotropy change and statistically by the Fisher's *F*-test on sums of squares at  $p = 0.05$ . Estimates in  $\mu\text{M}$  are given as means  $\pm$  SE of three or more replicate experiments. n.d., not detectable.

*Dissociation constants of 1:1 and 2:1 complexes in the absence of osmolytes or crowders*

| $K_{D1}$ and $K_{D2}$ , $\mu\text{M}$ | [Na <sup>+</sup> ], M                |                                 |                                      |
|---------------------------------------|--------------------------------------|---------------------------------|--------------------------------------|
|                                       | 0.15                                 | 0.10                            | 0.05                                 |
| $\Delta\text{N117}$                   | $0.0038 \pm 0.0019$<br>$7.1 \pm 3.3$ | $0.010 \pm 0.001$<br>$15 \pm 5$ | $0.19 \pm 0.05$                      |
| $\Delta\text{N165}$                   | $0.0091 \pm 0.0015$<br>$1.9 \pm 0.9$ | $0.036 \pm 0.003$               | $0.13 \pm 0.02$                      |
| $s\Delta\text{N117}$                  | $0.0051 \pm 0.0007$<br>$6.0 \pm 1.3$ |                                 | $0.0074 \pm 0.0022$<br>$3.5 \pm 1.8$ |
| $s\Delta\text{N165}$                  | $0.11 \pm 0.03$<br>$15 \pm 9$        |                                 | $0.13 \pm 0.02$<br>$32 \pm 24$       |
| $\text{D}_2\Delta\text{N117}$         | $0.0056 \pm 0.0008$<br>$6.7 \pm 3.2$ |                                 |                                      |
| $\text{D}_4\Delta\text{N117}$         | $0.013 \pm 0.004$<br>$108 \pm 39$    |                                 |                                      |
| DKCDK monomer                         | $0.013 \pm 0.03$<br>$2.5 \pm 0.4$    |                                 |                                      |
| DKCDK dimer                           | $3.1 \pm 0.9$<br>n.d.                |                                 |                                      |
| R232A/R235A                           | $>0.5$                               |                                 |                                      |

*Dissociation constants of 1:1 and 2:1 complexes in the presence of co-solutes*

| $K_{D1}$ and $K_{D2}$ , M | [Co-solute], % w/v                                               |                                                                         |
|---------------------------|------------------------------------------------------------------|-------------------------------------------------------------------------|
|                           | 15%                                                              | 20%                                                                     |
| Ovalbumin                 | $(3.8 \pm 0.7) \times 10^{-9}$<br>$(9.5 \pm 1.1) \times 10^{-6}$ | $(6.3 \pm 0.6) \times 10^{-9}$<br>$(3.2 \pm 0.5) \times 10^{-5}$        |
| BSA                       | 5%                                                               | 10%                                                                     |
|                           | $(7.9 \pm 1.5) \times 10^{-11}$<br>$>10^{-4}$                    | $(3.0 \pm 1.9) \times 10^{-11}$<br>$>10^{-4}$                           |
| PEG 8K                    | 10%                                                              | Ethylene glycol                                                         |
|                           | $(1.6 \pm 0.7) \times 10^{-8}$<br>$(2.1 \pm 1.5) \times 10^{-6}$ | 10%<br>$(7.0 \pm 1.6) \times 10^{-9}$<br>$(6.2 \pm 1.6) \times 10^{-6}$ |

[NaCl] = 0.15 M

*Two-state dissociation constants of  $\Delta N117$  and  $\Delta N165$  constructs by CD spectroscopy*

(Affinities at 0.15 M NaCl unless otherwise indicated)

| Construct                    | $K_2$ , $\mu\text{M}$                   |
|------------------------------|-----------------------------------------|
| $\Delta N117$ (wildtype)     | $46 \pm 20$                             |
| s $\Delta N117$              | $\gg 300$                               |
| D <sub>2</sub> $\Delta N117$ | $25 \pm 3$                              |
| D <sub>4</sub> $\Delta N117$ | $13 \pm 1$                              |
| $\Delta N165$ (wildtype)     | $\gg 800$<br>$202 \pm 72$ (0.05 M NaCl) |
| s $\Delta N165$              | n.d.                                    |

**Table S2. Primers in RT-PCR experiments.**

| Gene          | ↔ | Sequence                             | Amplicon, bp | $T_m$ , °C |
|---------------|---|--------------------------------------|--------------|------------|
| <i>pu.1</i>   | F | 5'-CTC CAG TAC CCA TCC CTG TC-3'     | 158          | 64         |
|               | R | 5'-CGG ATC TTC TTC TTG CTG CC-3'     |              |            |
| <i>csf1ra</i> | F | 5'-CAG AGC CTG CTG ACT GTT GA-3'     | 263          | 60         |
|               | R | 5'-TTG CCC TCA TAG CTC TCG AT-3'     |              |            |
| <i>e2f1</i>   | F | 5'-AAG GGA AGG AGT CTG TGT GG-3'     | 214          | 64         |
|               | R | 5'-CGA AAG TGC AGT TAG AGC CC-3'     |              |            |
| <i>gapdh</i>  | F | 5'-CGG AGT CAA CGG ATT TGG TCG-3'    | 225          | 60         |
|               | R | 5'-TCT CGC TCC TGG AAG ATG GTG AT-3' |              |            |

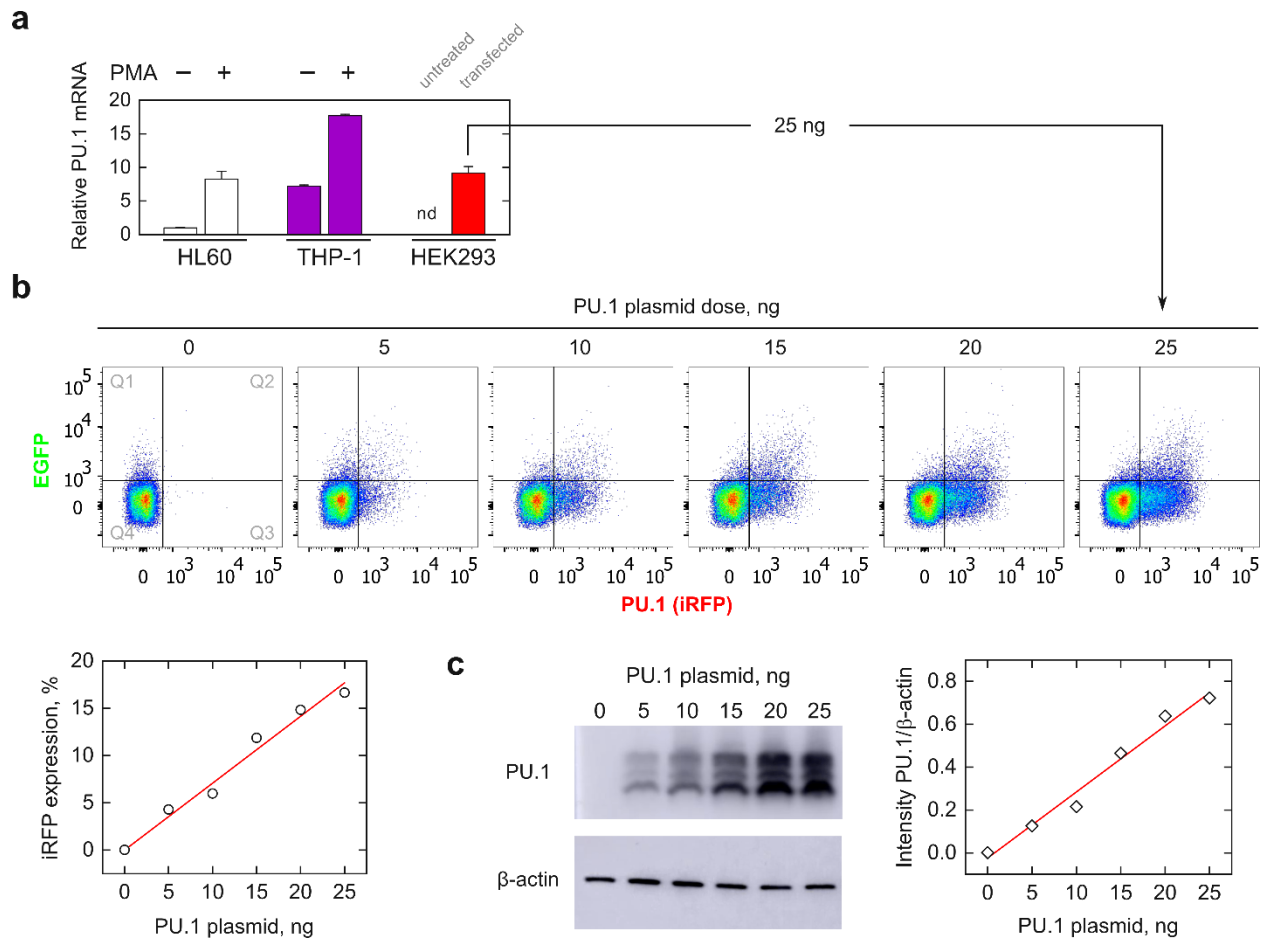

**Fig. S1. Calibration of transgenic PU.1 dosage.** **a**, To determine the dosage of PU.1 transgene that would yield physiologically relevant levels of PU.1, transcripts of the *pu.1/Spi1* gene were quantified in two model human myeloid cell lines, under normal proliferative conditions as well as under induction by 16 nM of phorbol 12-myristate (PMA). Consistent with the strong inducibility of PU.1 in primary tissue, PMA induced PU.1 mRNA transcripts in both cell lines. All samples were presented as means  $\pm$  SE of at least 3 biological replicates relative to *gapdh*. The data establish that a maximum dose of 25 ng (per well of a 24-well plate) of the PU.1 expression plasmid in HEK293 (see *Materials and Methods* in the main text) would yield an expression level comparable to induced HL-60 and non-induced THP-1, but well below levels in that cell line under PMA induction. **b**, We then determined whether 25 ng of the PU.1-expression plasmid would yield a linear dosing range for the  $\lambda$ B reporters following transient transfection in HEK293 cells. PU.1 expression was quantified by its co-translating PU.1 iRFP marker by flow cytometry. Cells in quadrant Q2 and Q3 represented PU.1-expressing cells. The sum of their counts were plotted against the plasmid dosage. *Line* represents a linear fit to the data. **c**, To cross-validate the flow cytometric approach, PU.1 abundance was also measured by immunoblotting transfected HEK293 lysates at 10  $\mu$ g per lane. PU.1 was probed with a rabbit polyclonal antibody (Cell Signaling, #2266) followed by an HRP-coupled mouse anti-rabbit secondary antibody (Santa Cruz).  $\beta$ -actin (loading control) was probed with a mouse monoclonal antibody (Santa Cruz) with an HRP-coupled rabbit anti-mouse secondary antibody (Santa Cruz). Blots were visualized using an Amersham Imager 600 and quantified using ImageJ software.

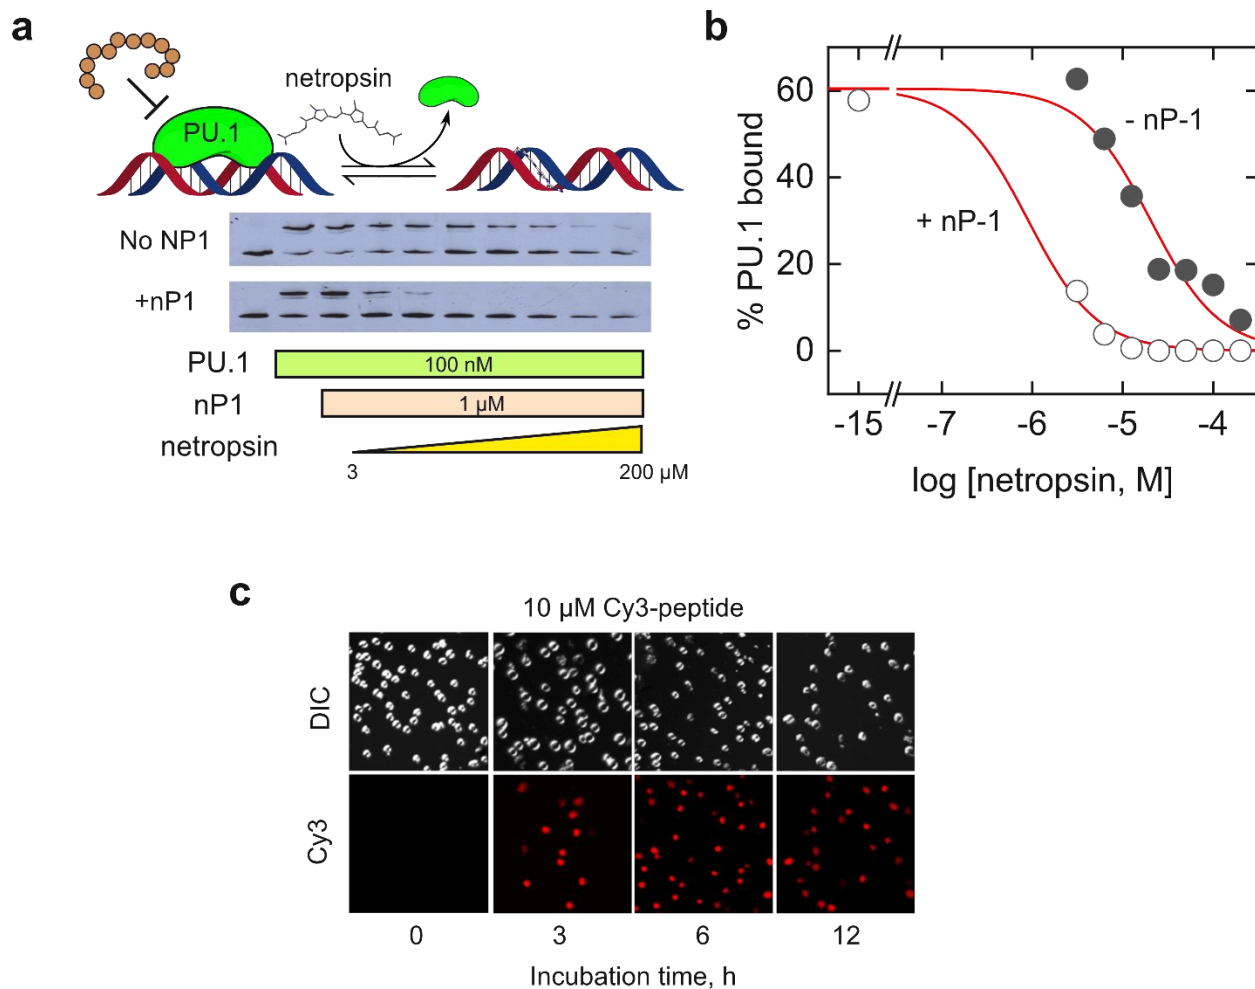

**Fig. S2. Characterization of a peptide-based PU.1 inhibitor.** **a**, The synthetic dodecameric peptide nP-1 (Ac-RDYHPRDHTATW-NH<sub>2</sub>) inhibited cognate DNA binding by PU.1 in a competitive gel-mobility shift assay using netropsin. Each netropsin-containing lane represented a 2-fold increase in concentration. In the negative control without nP-1, PU.1 was displaced by netropsin binding to the DNA minor groove adjacent to the 5'-GGAA-3' consensus. **b**, Quantification of the mobility shift data shows that nP-1 at 1  $\mu$ M was highly synergistic with netropsin, reducing the apparent IC<sub>50</sub> by >20 fold. **c**, Uptake of Cy3-labeled peptide by THP-1 cells at 10  $\mu$ M, imaged at 63 $\times$  magnification.

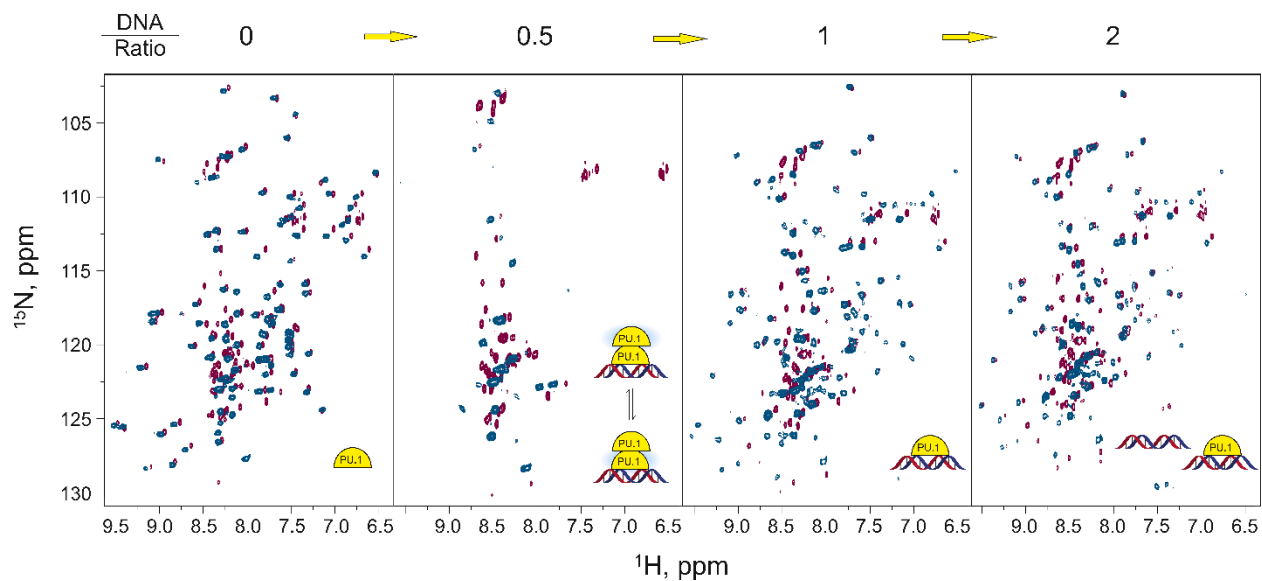

**Fig. S3.**  $^1\text{H}$ - $^{15}\text{N}$  HSQC-detected titration of  $\Delta\text{N117}$  and  $\Delta\text{N165}$  by cognate DNA.  $\Delta\text{N117}$  is in red,  $\Delta\text{N165}$  in blue. Conditions were essentially the same as the DOSY titration in Figure 1B (0.15 M NaCl), except uniformly  $^{15}\text{N}$ -labeled protein was used at 400  $\mu\text{M}$ .



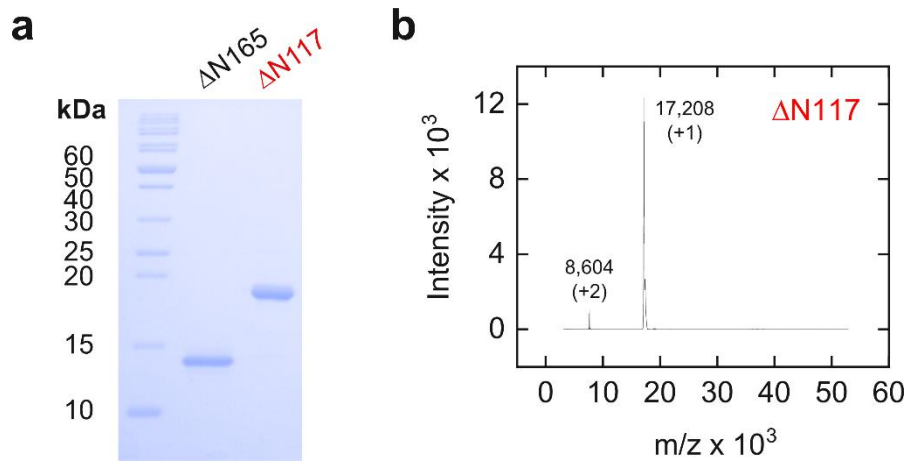

**Fig. S4. Purity of recombinant PU.1 constructs.** a, One  $\mu\text{g}$  of each purified PU.1 construct was resolved in a 15% polyacrylamide gel (29:1) under standard denaturing (0.1% SDS) and reducing conditions (0.5 mM TCEP). b, MALDI-ToF mass spectrum of  $\Delta N117$ .

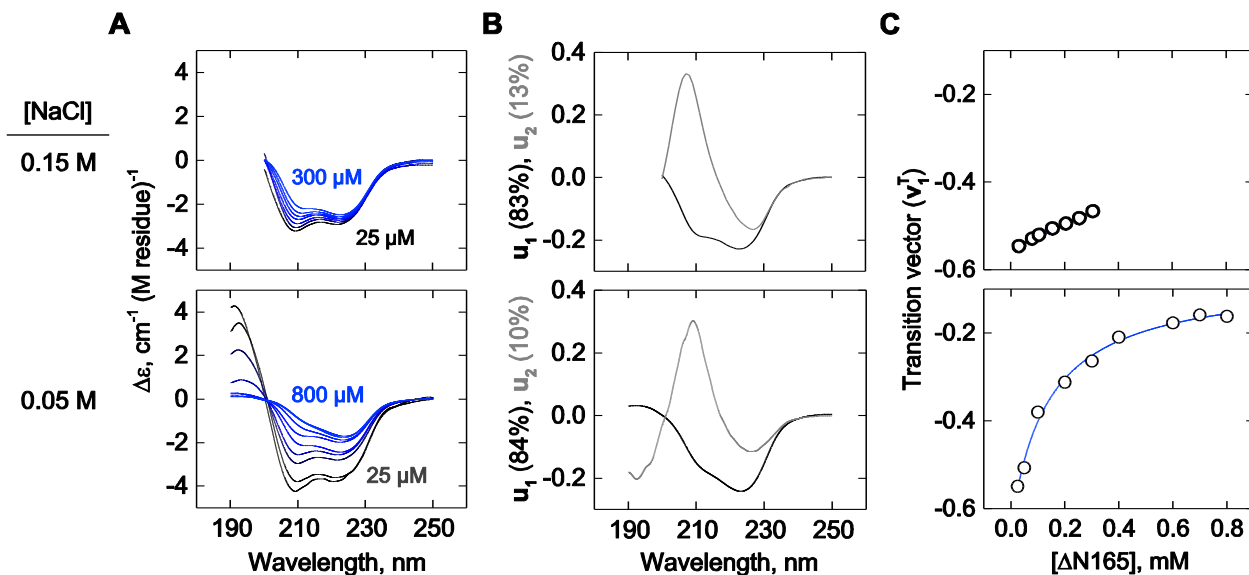

**Fig. S5. Spectral analysis of far-UV CD of  $\Delta N165$  in 0.15 and 0.05 M NaCl.** **a**, Blank-subtracted, concentration-corrected spectra. Absorption by  $\text{Cl}^-$  limits the useable ranges of wavelengths and protein concentration in 0.15 M NaCl to those shown. **b**, Following singular value decomposition (see *Materials and Methods* for details), the two most dominant basis vectors in  $\mathbf{U}$ . **c**, Progress curves of the concentration dependence as represented by the transition vectors  $\mathbf{V}^T$ . The 0.05 M transition was fitted to a two-state dimer. The dissociation constant is  $202 \pm 72 \mu\text{M}$ .

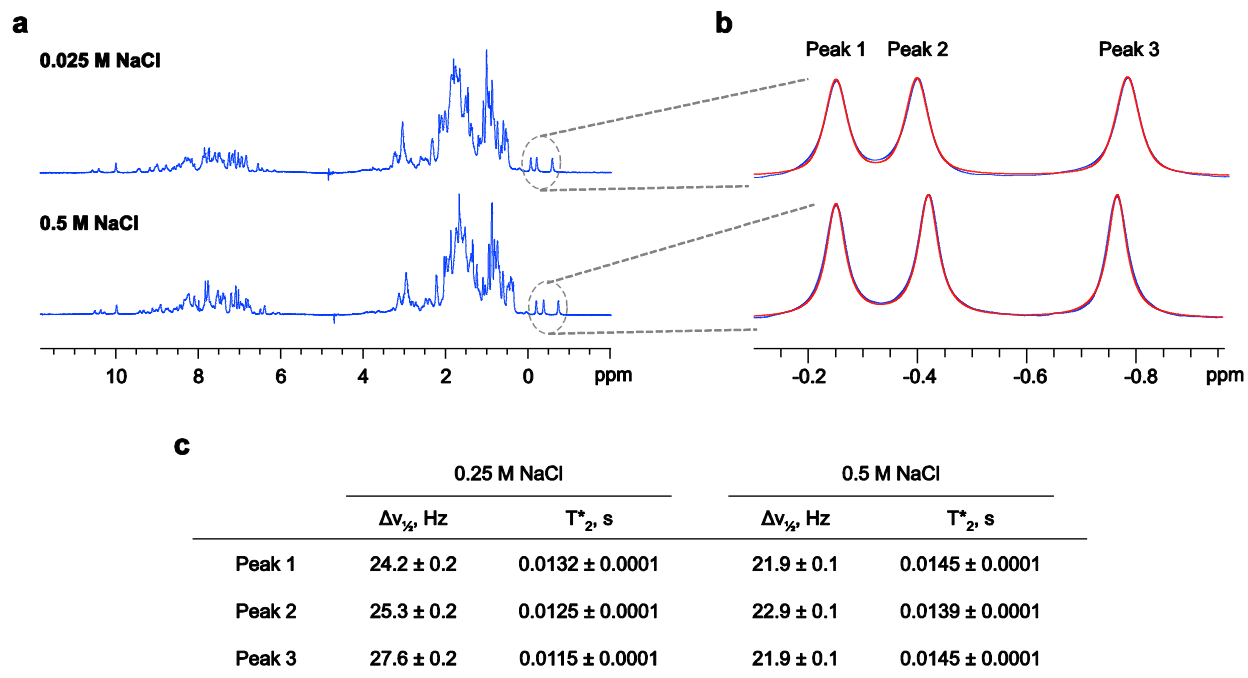

**Fig. S6. Salt-dependent line broadening of methyl protons in  $\Delta$ N165.** **a**, Methyl protons located at negative chemical shifts of  $^1\text{H}$  spectra, acquired at 500 MHz, of identical concentrations (350  $\mu\text{M}$ ) of  $\Delta$ N165 in the presence of 0.025 and 0.5 M NaCl, respectively. **b**, The linewidths, converted to  $\text{Hz} = \text{s}^{-1}$ , were fitted to a sum of Lorentzian peaks (red) from which the full widths at half maximum ( $\Delta\nu_{1/2}$ ) were estimated by nonlinear regression. **c**, The effective  $T_2^*$  for each peak was then computed from

$$T_2^* = \frac{1}{\pi\Delta\nu_{1/2}} \quad (\text{S1})$$

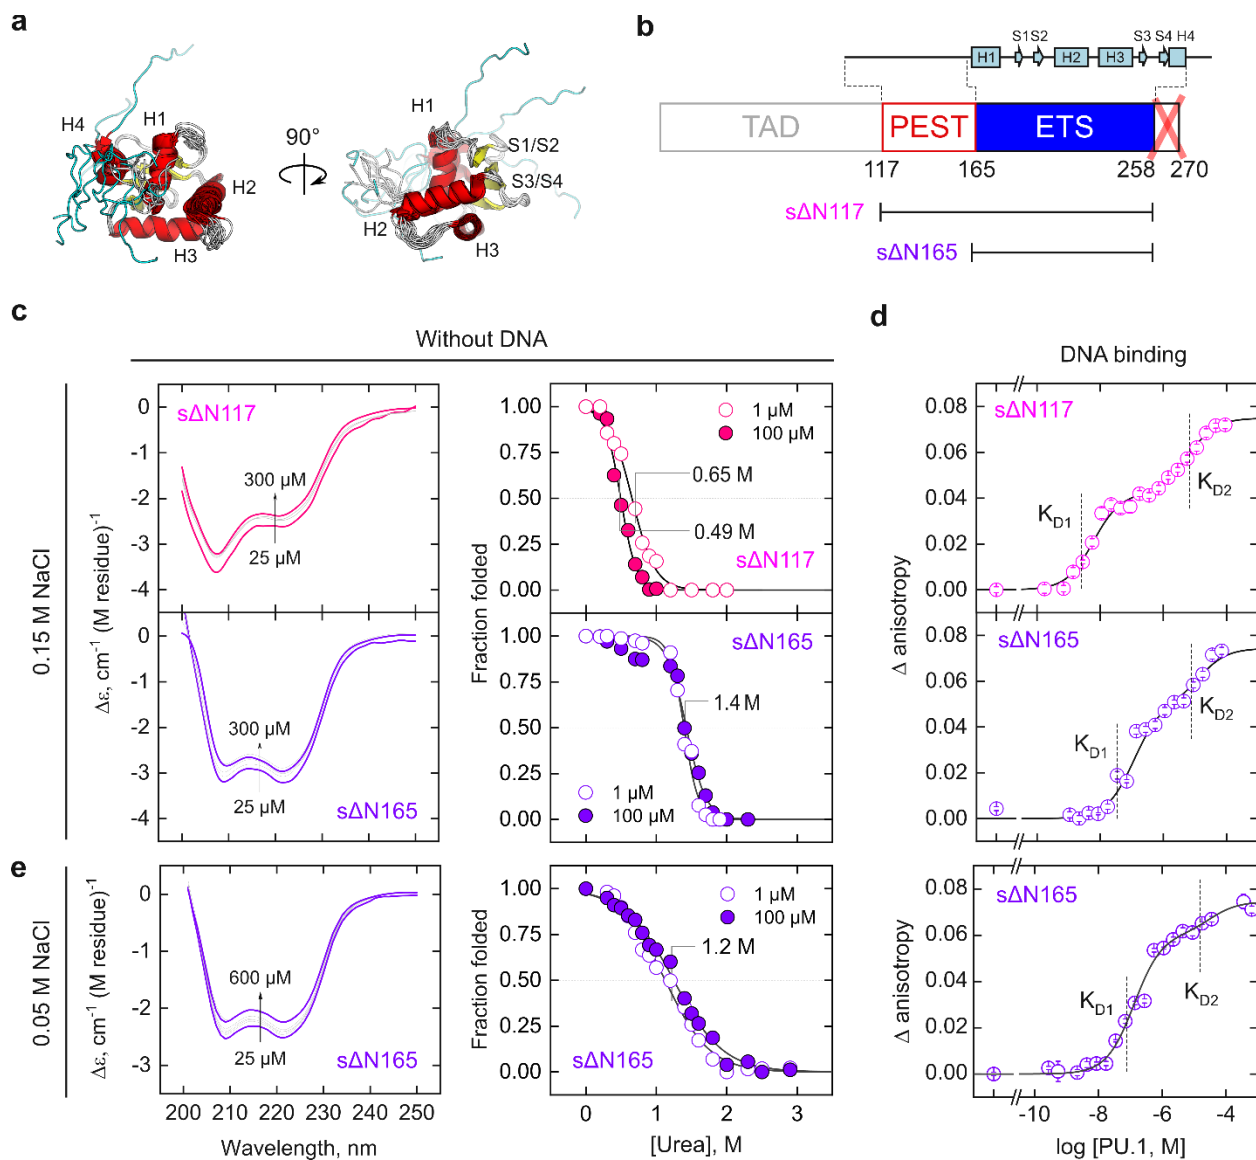

**Fig. S7. The short C-terminal IDR is required for DNA-free PU.1 dimerization.** **a**, Superposition of the 10 models in the solution NMR structure of the PU.1 monomer, 5W3G. The C-terminal IDR is colored cyan. **b**, Schematic of PU.1 constructs, sΔN117 and sΔN165, without the C-terminal 12-residue IDR. **c**, Far-UV CD spectra (left) and urea denaturation curves (right) of sΔN117 and sΔN165 at 0.15 M Na<sup>+</sup>. The molarity stated represents urea concentrations at 50% unfolding. **d**, Cognate DNA binding by sΔN117 and sΔN165 at 0.15 M Na<sup>+</sup>. **e**, Corresponding data for sΔN165 at 0.05 M Na<sup>+</sup>. In contrast with ΔN165 (*c.f.* Figures 5a and b), sΔN165 shows negligible propensity for dimerization without DNA but exhibits biphasic DNA binding.

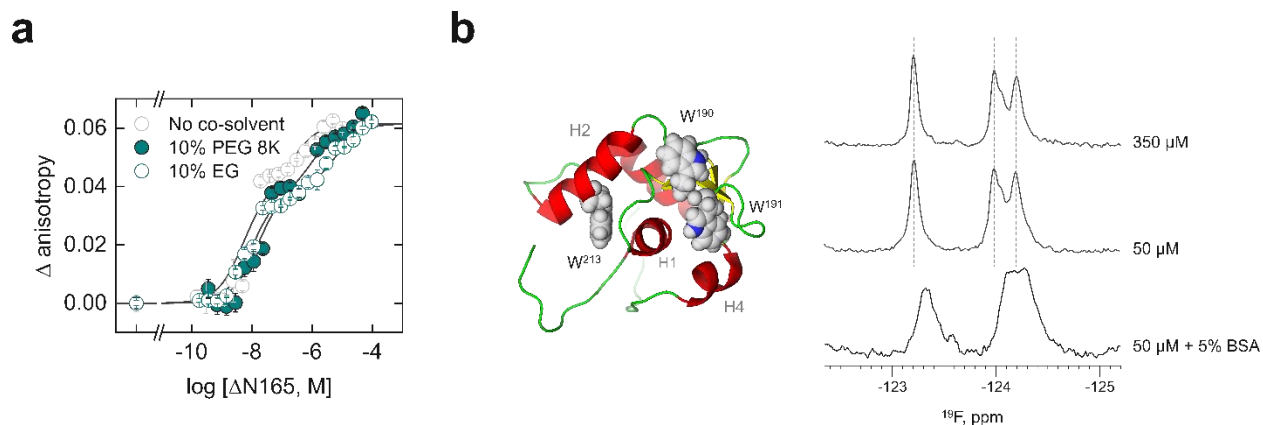

**Fig. S8. Effect of macromolecular crowding on dimerization of  $\Delta$ N165 in the unbound and DNA-bound states.** **a**, Charge-neutral crowding with PEG 8K on cognate DNA binding by  $\Delta$ N165. Representative titrations in the presence of 10% w/v ethylene glycol (EG) showed destabilization consistent with osmotic stress as previously reported (Poon, *J Biol Chem* 287, 18297-18307, 2012). The presence of the same mass concentration of polymeric PEG 8K was similar. In both cases and in stark contrast with the acidic crowder BSA, the 2:1 complex was preserved. **b**, <sup>19</sup>F NMR reveals conformational perturbations in  $\Delta$ N165 consistent with unbound dimer formation. The three Trp residues (190, 191, and 213) in  $\Delta$ N165 were isotopically labeled with 5-fluoroindole in minimal M9 media. Chemical shifts were acquired at 0.15 M Na<sup>+</sup> in D<sub>2</sub>O-reconstituted buffer and referenced against the published value for 5-fluoroindole in 90% D<sub>2</sub>O (Sarker et al., *Biochemistry* 55, 3048-3059, 2016). No concentration-dependent chemical shift perturbation (CSP) was detectable at 350 and 50  $\mu$ M at  $\Delta$ N165, in contrast with the presence of 5% w/v BSA. Line broadening in the BSA-containing sample was expected due to increased viscosity.
